# Supplementary material
Source: publisher figshare collection journal article supplement (https://rs.figshare.com/ndownloader/files/17961539)
Supplement: Supplementary file 1 [file 17961539]

## Sheet: Sheet1
System/Species	Drive	Target	Suppression	Phenotype	Possible mechanisms	References
Melanogaster Group
SD/D. melanogaster	Duplication of RanGAP (2nd chromosome)	Rsp	X and 3rd linked suppression	Chromatin condensation, and sperm individualization	1,2,3	(Larracuente and Presgraves 2012)
Paris/D. simulans	HP1D2 loss of function and a duplication	Y	Autosomal suppression and Y resistance	Meiosis defects	1,2	(Cazemajor et al. 2000; Helleu et al. 2016)
Winters/D. simulans	Duplication of Mdox	Y	Autosomal suppression (Nmy) and Y resistance	Chromatin condensation	1,2	(Tao et al 2007a, Lin et al. 2018)
Durham/D.simulans	Unknown	Y	Autosomal suppression (Tmy)	Unknown	1	(Lin et al. 2018)
Obscura Group
D. obscura	Unknown	Y	Unknown	Unknown		(Gershenson 1928)
D. pseudoobscura	Overdrive	Y	Autosomal suppression	Unknown		(Phadnis and Orr 2009)
D. pseudoobscura	≥ 4 loci, Unknown	Y	no suppressor	Meiosis defects		(Sturtevant and Dobzansky 1936; Novitsky et al. 1965)
D. subobscura	Unknown	Y	Autosomal suppression	Meiosis defects		(E Hauschteck-Jungen, Jungen, et Müller 1972; Verspoor at la. 2018)
D. athabasca	Unknown	Y	Unknown	Meiosis defects		(Novitsky et al. 1965)
D. affinis	Unknown	Y	Y resistance	Chromatin condensation, and sperm individualization		(Unckless et al. 2015) and personal communication
D. persimilis	Unknown	Y	Unknown	Unknown		(Sturtevant and Dobzansky 1936; Wu and Beckenbach 1983)
D. azteca	Unknown	Y	Unknown	Unknown		(Sturtevant and Dobzansky 1936)
Testacea Group
D. neotestacea	Importin-α2 (supposed)	Y	no suppressor	Sperm individualization	3	(James and Jaenike 1990, Pieper et al. 2018)
D. testacea	Unknown	Y	Autosomal suppression and/or Y resistance	Abnormal sperm cysts		(Keais et al 2017)
Quinaria Group
D. quinaria	Unknown	Y	Autosomal suppression	Unknown		(Jaenike 1996)
D. recens	Unknown	Y	no suppressor	Unknown		(Jaenike 1996)
Melanica Group
D. paramelanica	(≥ 4 loci) Unknown	Y	Autosomal suppression and Y resistance	Meiosis defects		(Stalker 1961)
Immigrans Group
D. albomicans	Unknown	Y	Autosomal suppression	Sperm individualization		(Yang at al. 2004; Zhang et al. 2015)
Tripunctata Group
D. mediopunctata	Unknown	Y	Autosomal suppression and Y resistance	Unknown		(Carvalho and Klaczko 1993)
Table 2.1 : Summary of all known meiotic drive system in Drosophila.
Mechanism involved in drive or drive suppression : 1. Small RNA pathway – 2. Heterochromatin formation – 3. Nuclear transport.
